# Supplementary material
Source: PubMed Central journal article supplement (PMC3425941)
Supplement: NIHMS384990-supplement-Supp_Table_S1.pdf [file NIHMS384990-supplement-Supp_Table_S1.pdf]

**Supplementary Table 1**

SNP and gene information. P-value refers to the test of association, as described in the text. HWE p-value indicates p-value for test of Hardy-Weinberg equilibrium. MAF indicates minor allele frequency in the HapMap ASW (African ancestry in Southwest USA), where available. No SNPs passed both design and QC for DRD5 gene. \* indicates statistical significance for the SNP, as described in the text.

| <b>Genes</b>                        | <b>rs ID</b> | <b>Chromosome</b> | <b>Position</b> | <b>p-value</b> | <b>HWE p-value</b> | <b>MAF</b> |
|-------------------------------------|--------------|-------------------|-----------------|----------------|--------------------|------------|
| POMC                                | rs1866146    | 2                 | 25234077        | 0.630          | 0.116              | 0.15       |
| DRD3                                | rs9817063    | 3                 | 115329798       | 0.978          | 0.441              | 0.30       |
|                                     | rs3732790    | 3                 | 115329973       | 0.127          | 1.000              | 0.15       |
|                                     | rs3773678    | 3                 | 115352768       | 0.984          | 1.000              | 0.46       |
|                                     | rs2630349    | 3                 | 115356062       | 0.762          | 1.000              | 0.28       |
|                                     | rs167771     | 3                 | 115358965       | 0.302          | 1.000              | 0.36       |
|                                     | rs324031     | 3                 | 115360691       | 0.850          | 0.723              |            |
|                                     | rs167770     | 3                 | 115362252       | 0.642          | 1.000              | 0.38       |
|                                     | rs226082     | 3                 | 115363703       | 0.266          | 0.645              | 0.33       |
|                                     | rs9825563    | 3                 | 115382910       | 0.530          | 0.496              | 0.44       |
| GABRA2                              | rs573400     | 4                 | 45946823        | 0.141          | 0.651              | 0.27       |
|                                     | rs3822051    | 4                 | 45951469        | 0.998          | 1.000              |            |
|                                     | rs534459     | 4                 | 45951562        | 0.752          | 0.720              | 0.30       |
|                                     | rs526805     | 4                 | 45958148        | 0.674          | 0.691              | 0.38       |
|                                     | rs279869     | 4                 | 46002752        | 0.850          | 1.000              |            |
|                                     | rs279858     | 4                 | 46009350        | 0.474          | 1.000              | 0.29       |
|                                     | rs175931     | 4                 | 46011080        | 0.236          | 1.000              |            |
|                                     | rs203656     | 4                 | 46011118        | 0.226          | 1.000              | 0.37       |
|                                     | rs279843     | 4                 | 46019961        | 0.125          | 0.722              | 0.46       |
|                                     | rs279844     | 4                 | 46024412        | 0.586          | 1.000              |            |
|                                     | rs279826     | 4                 | 46028966        | 0.542          | 1.000              | 0.48       |
|                                     | rs279830     | 4                 | 46030438        | 0.580          | 0.640              |            |
|                                     | rs279836     | 4                 | 46033827        | 0.708          | 0.640              |            |
|                                     | rs279837     | 4                 | 46034080        | 1.000          | 1.000              | 0.26       |
|                                     | rs10805145   | 4                 | 46053088        | 0.900          | 0.734              | 0.49       |
|                                     | * rs11503014 | 4                 | 46085622        | 0.0016         | 0.057              | 0.31       |
|                                     | rs6856130    | 4                 | 46087917        | 0.470          | 0.307              | 0.49       |
| SLC6A3<br>(dopamine<br>transporter) | rs6347       | 5                 | 1464412         | 0.922          | 0.510              | 0.48       |
|                                     | rs27048      | 5                 | 1465645         | 0.652          | 1.000              | 0.40       |
|                                     | rs2042449    | 5                 | 1469646         | 0.968          | 0.645              | 0.19       |
|                                     | rs37020      | 5                 | 1471374         | 0.780          | 0.001              |            |
|                                     | rs10040882   | 5                 | 1471558         | 0.630          | 0.645              |            |
|                                     | rs460000     | 5                 | 1485825         | 0.484          | 0.345              | 0.48       |
|                                     | rs3756450    | 5                 | 1501148         | 0.530          | 0.395              | 0.48       |
| DRD1                                | rs251937     | 5                 | 174799526       | 0.528          | 0.281              | 0.31       |
|                                     | rs12518222   | 5                 | 174799775       | 0.181          | 1.000              |            |
|                                     | rs4867798    | 5                 | 174800505       | 0.189          | 0.237              | 0.33       |
|                                     | rs686        | 5                 | 174801306       | 0.760          | 1.000              | 0.49       |
|                                     | rs4532       | 5                 | 174802756       | 0.182          | 0.116              | 0.12       |
| OPRM1                               | rs511435     | 6                 | 154410240       | 1.000          | 0.444              | 0.24       |
|                                     | rs524731     | 6                 | 154416785       | 0.344          | 1.000              | 0.17       |
|                                     | rs3823010    | 6                 | 154420845       | 0.370          | 1.000              | 0.17       |

|                                      |             |    |           |       |       |      |
|--------------------------------------|-------------|----|-----------|-------|-------|------|
|                                      | rs3778156   | 6  | 154446006 | 0.574 | 0.593 |      |
|                                      | rs540825    | 6  | 154456139 | 0.986 | 0.298 | 0.07 |
|                                      | rs675026    | 6  | 154456256 | 0.278 | 1.000 | 0.26 |
|                                      | rs562859    | 6  | 154456266 | 0.047 | 0.735 | 0.32 |
|                                      | rs548646    | 6  | 154459840 | 0.186 | 0.312 | 0.42 |
|                                      | rs609148    | 6  | 154472707 | 0.500 | 1.000 |      |
|                                      | rs1323041   | 6  | 154480873 | 0.536 | 0.307 |      |
|                                      | rs671531    | 6  | 154482434 | 0.234 | 0.069 | 0.36 |
|                                      | rs518596    | 6  | 154504070 | 0.234 | 0.723 | 0.47 |
|                                      | rs9479767   | 6  | 154518220 | 0.099 | 0.734 | 0.48 |
|                                      | * rs2236256 | 6  | 154520132 | 0.031 | 1.000 | 0.49 |
|                                      | rs6902403   | 6  | 154520695 | 0.664 | 1.000 | 0.29 |
|                                      | rs4295492   | 6  | 154606485 | 0.486 | 0.088 | 0.42 |
| DRD4                                 | rs11246226  | 11 | 631191    | 0.538 | 1.000 | 0.45 |
|                                      | rs936465    | 11 | 633568    | 0.876 | 0.494 |      |
| DRD2                                 | rs2234689   | 11 | 112783693 | 0.594 | 1.000 | 0.08 |
|                                      | rs2242592   | 11 | 112784640 | 0.360 | 1.000 | 0.40 |
|                                      | rs6279      | 11 | 112786283 | 0.159 | 0.718 |      |
|                                      | rs6275      | 11 | 112788687 | 0.210 | 0.706 | 0.43 |
|                                      | rs1076560   | 11 | 112788898 | 0.788 | 1.000 | 0.11 |
|                                      | rs1800498   | 11 | 112796798 | 0.277 | 1.000 |      |
|                                      | rs4436578   | 11 | 112811975 | 0.986 | 1.000 | 0.42 |
|                                      | rs4648318   | 11 | 112818599 | 0.422 | 1.000 | 0.46 |
|                                      | rs4936271   | 11 | 112823915 | 0.686 | 0.102 | 0.38 |
|                                      | rs4274224   | 11 | 112824662 | 0.790 | 0.177 | 0.37 |
|                                      | rs4581480   | 11 | 112829684 | 0.604 | 0.720 | 0.50 |
| TPH2                                 | rs11178999  | 12 | 70619837  | 0.500 | 1.000 | 0.28 |
|                                      | rs10748186  | 12 | 70622255  | 0.346 | 1.000 | 0.25 |
|                                      | rs2129575   | 12 | 70626340  | 1.000 | 0.449 | 0.24 |
|                                      | rs1386488   | 12 | 70630885  | 1.000 | 1.000 | 0.27 |
|                                      | rs1843809   | 12 | 70634965  | 0.818 | 0.285 | 0.38 |
|                                      | rs2220330   | 12 | 70637975  | 1.000 | 0.116 |      |
|                                      | rs1386495   | 12 | 70638589  | 0.794 | 0.174 |      |
|                                      | rs1386494   | 12 | 70638810  | 1.000 | 0.116 |      |
|                                      | rs6582072   | 12 | 70640744  | 1.000 | 0.593 | 0.31 |
|                                      | rs1386493   | 12 | 70641446  | 1.000 | 0.599 | 0.31 |
|                                      | rs1386492   | 12 | 70648532  | 0.886 | 0.734 |      |
|                                      | rs7978482   | 12 | 70652240  | 0.766 | 0.498 | 0.49 |
|                                      | rs4760815   | 12 | 70658496  | 0.888 | 0.278 |      |
|                                      | rs7305115   | 12 | 70659129  | 0.882 | 0.278 | 0.38 |
|                                      | rs10506646  | 12 | 70682759  | 0.732 | 0.712 | 0.25 |
|                                      | rs11179039  | 12 | 70688453  | 0.786 | 0.734 | 0.48 |
|                                      | rs1473473   | 12 | 70690645  | 0.272 | 0.014 |      |
|                                      | rs9325202   | 12 | 70693744  | 0.488 | 0.734 | 0.50 |
|                                      | rs4290270   | 12 | 70702502  | 0.464 | 0.727 |      |
|                                      | rs1487279   | 12 | 70705573  | 0.958 | 0.502 |      |
| SLC6A4<br>(serotonin<br>transporter) | rs7224199   | 17 | 25547852  | 0.972 | 0.503 | 0.46 |
|                                      | rs1042173   | 17 | 25549137  | 0.232 | 0.660 | 0.24 |
|                                      | rs3794808   | 17 | 25555919  | 0.426 | 0.492 | 0.28 |
|                                      | rs140701    | 17 | 25562658  | 0.554 | 0.184 | 0.28 |
|                                      | rs8076005   | 17 | 25571336  | 0.076 | 0.723 | 0.45 |

|      |           |    |          |       |       |      |
|------|-----------|----|----------|-------|-------|------|
|      | rs6354    | 17 | 25574024 | 0.252 | 0.258 | 0.28 |
|      | rs25528   | 17 | 25574104 | 0.155 | 0.484 | 0.43 |
|      | rs2066713 | 17 | 25575791 | 0.153 | 0.681 | 0.37 |
| COMT | rs933271  | 22 | 18311407 | 0.884 | 1.000 | 0.43 |
|      | rs4633    | 22 | 18330235 | 0.218 | 1.000 | 0.30 |
|      | rs740601  | 22 | 18330763 | 0.314 | 0.497 | 0.37 |
|      | rs4646316 | 22 | 18332132 | 0.082 | 1.000 | 0.25 |
|      | rs165774  | 22 | 18332561 | 0.253 | 0.074 | 0.18 |
| ARSA | rs5770953 | 22 | 49409804 | 0.998 | 0.476 | 0.40 |
|      | rs743616  | 22 | 49410905 | 0.132 | 0.034 |      |
